# Supplementary material
Source: PubMed Central journal article supplement (PMC2430522)
Supplement: NIHMS49854-supplement-01.pdf [file NIHMS49854-supplement-01.pdf]

## Supplemental Data

### Malignant Transformation Initiated by *MII-AF9*:

#### Gene Dosage and Critical Target Cells

Weili Chen, Ashish R. Kumar, Wendy A. Hudson, Quanzhi Li, Baolin Wu, Rodney A. Staggs, Erik A. Lund, Thien N. Sam, and John H. Kersey

#### Supplemental Experimental Procedures

##### Microarray Analysis

For gene expression profiling experiments, sorted cells were collected directly into RNA lysis buffer (Buffer RLT, Qiagen Inc.) and total RNA was extracted using the Micro RNeasy kit (Qiagen). Quality of the RNA was assessed using the RNA 6000 Pico LabChip kit (Agilent Technologies Inc., Palo Alto, CA) and the RNA was amplified using the Two Cycle Labeling kit (Affymetrix, Santa Clara, CA). Labeled cRNA was hybridized to Mouse 430 2.0 GeneChip arrays. Expression measures were estimated using the robust multi-array averaging (RMA) (Irizarry et al., 2003) algorithm using Genedata Expressionist Refiner (Epro 1.0.32, GeneData Inc.). Condensed measures were imported into GeneData Expressionist Analyst where the arrays were normalized by the LOESS method using all experiments in generating the reference experiment. The Affymetrix murine 430 2.0 genechip array has 45,101 probe sets. For analysis, based on current annotations, we first filtered-out the probes without Unigene annotations, leaving us with 41,628 probe sets. To determine the differentially expressed genes in *MII-AF9* samples compared to wild type samples, the following method was used:

For the expression values of gene  $j$ :  $\{x_{1j}, \dots, x_{nj}\}$ , we fitted the following additive effects model

$$x_{ij} = \alpha_j + \beta_j t_i + \sum_{k=1}^3 \theta_{kj} z_{ki}, \quad i = 1, \dots, n.$$

where  $t_i$  is the indicator for the *Mll-AF9* versus the wild type effect and  $z_{1i}$ ,  $z_{2i}$ ,  $z_{3i}$  are three indicator variables for the cell type effects. The parameter  $\beta_j$  summarized the *Mll-AF9* effect, and was used to identify differentially expressed genes. To make a comparison across genes, we need to identify the standard error of  $\beta_j$ , and to avoid small gene variations, a positive variation regularization term was added, which had been selected based on a numerical algorithm fitted to all the gene expression data. For significance estimation, we performed a stratified permutation test. Specifically, we permuted the *Mll-AF9* effect within each cell type, and then calculated the overall proportion of differentially expressed genes and the false discovery rate (FDR). The graph in Supplementary Figure 4 is a plot of FDR on the Y-axis against the number of probe sets on the X-axis. 548 probe sets corresponding to 446 non-redundant genes met the FDR of <0.1.

Of the 446 genes selected in the two-way ANOVA, those that are over-expressed in all 4 *Mll-AF9* cell populations and those that are under-expressed compared to the corresponding wild type populations are listed in Supplementary Table 1 and 2. Heat maps were generated using Cluster and Treeview available at <http://rana.lbl.gov/EisenSoftware.htm>.

### **Real time RT-PCR for *MLL-AF9*.**

For comparing *MLL-AF9* expression in retrovirally transduced and knockin GMPs, RNA was extracted using Trizol (Invitrogen) and subjected to DNase I digestion. Reverse transcription was performed using the Superscript First Strand cDNA Synthesis kit

(Invitrogen) and the cDNA was used as template in real-time PCR with SYBR green (ABI). Removal of genomic DNA was verified by using RNA as template in the PCR.

The primers used were:

*Gapdh*: CGTCCCGTAGACAAAATGGT and CTCCTGAAAGATGGTGATGG

*MLL-AF9*: TGTGAAGCAGAAATGTGTGG and TGCCTTGTCACATTCACCAT

### Supplemental References

Irizarry, R.A., Hobbs, B., Collin, F., Beazer-Barclay, Y.D., Antonellis, K.J., Scherf, U. and Speed, T.P. (2003). Exploration, normalization, and summaries of high density oligonucleotide array probe level data. *Biostatistics* 6, 249.

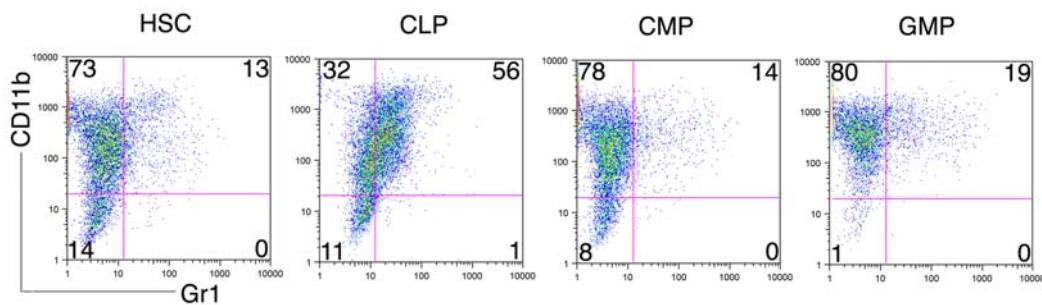

**Figure S1** | FACS analysis of CD11b and Gr1 expression in myeloid culture from different *MLL-AF9* sorted populations. The experiment was repeated in 3-6 mice for each cell type. A representative of each group is shown here.

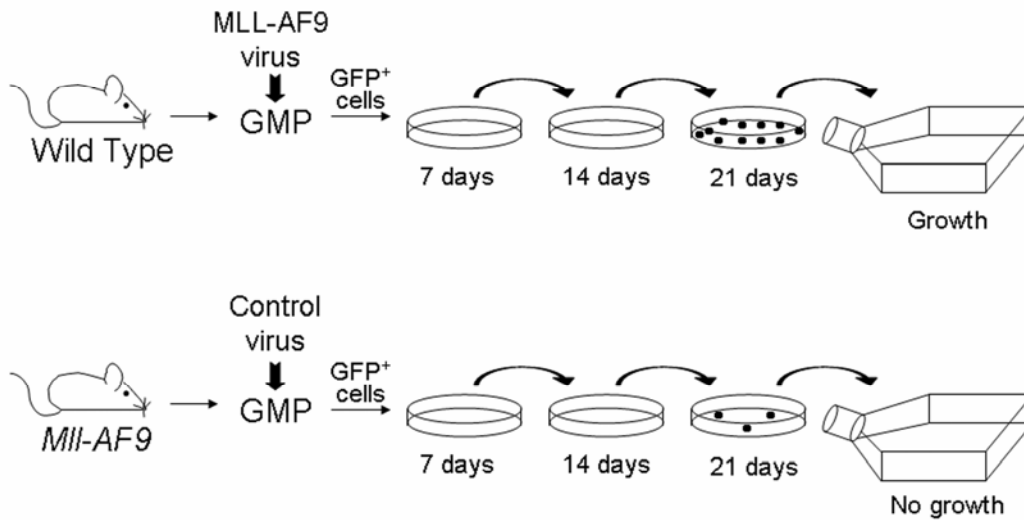

**Figure S2: Long term self renewing cells were established in vitro from retroviral *MLL-AF9* transduced GMPs but not from knockin *Mil-AF9* GMPs.**

The experimental design is shown in the figure. Colonies in methylcellulose cultures were examined at days 7, 14 and 21. At day 21, retroviral *MLL-AF9* transduced GMPs resulted in a mean of 183 compact colonies (per 1000 cells plated) compared to 13 compact colonies from knockin *Mil-AF9* GMPs. (See Figure 3C for details).

Subsequently, well-isolated compact colonies were picked individually and transferred into liquid medium. Ten of ten retroviral *MLL-AF9* cultures resulted in long term growth, while none of ten knockin *Mil-AF9* cultures grew long term.

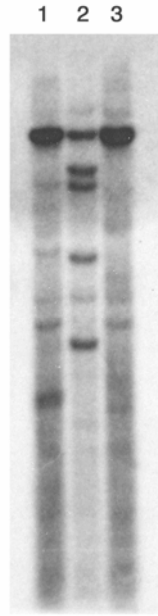

**Figure S3 | Southern blotting on the genomic DNA from *MLL-AF9* retrovirally transduced GMP cell cultures by a probe for GFP.** The result indicates the cultures from *MLL-AF9* transduced GMPs are oligoclonal. Sample 1, 2 and 3 came from 3 individual GMP transduction experiments.

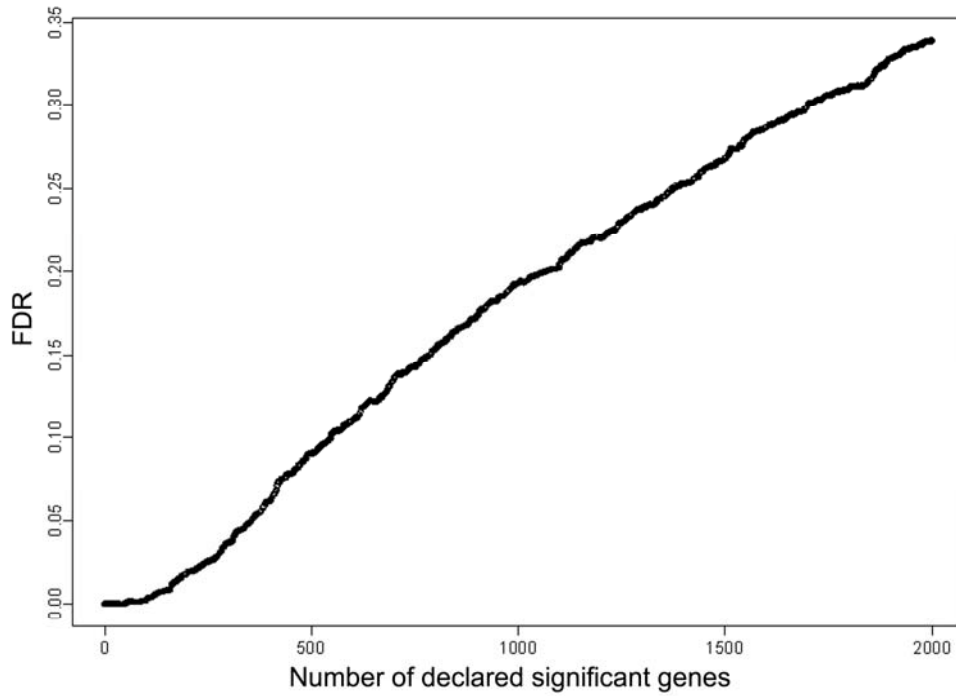

**Figure S4: Genes with differential expression in *MII-AF9* cells compared to wild type cells were identified in a 2-way ANOVA using a stratified permutation test.** The graph shown is a plot of FDR on the Y-axis against the number of probe sets on the X-axis. 548 probe sets corresponding to 446 non-redundant genes met the FDR of <0.1.

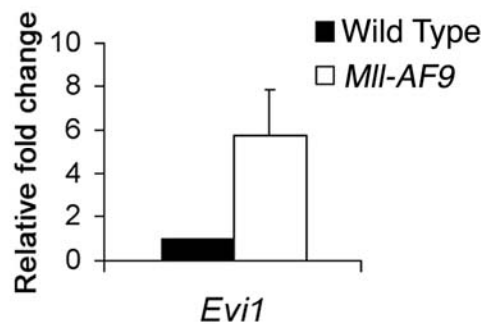

**Figure S5 |** Quantitative RT-PCR showing increased expression of *Evi1* in *MII-AF9* CMPs compared to wild type (N=3 for each group). Error bars represent standard error of the means.

## Supplementary Tables

**Table S1. Genes over-expressed in all *Mll-AF9* populations**

| <b><u>Probe ID</u></b> | <b><u>Gene Description</u></b>                                |
|------------------------|---------------------------------------------------------------|
| 1457642_at             | RIKEN cDNA 5730507N06 gene                                    |
| 1448926_at             | homeo box A5                                                  |
| 1438325_at             | ecotropic viral integration site 1                            |
| 1439514_at             | CDC28 protein kinase 1b                                       |
| 1437232_at             | bactericidal/permeability-increasing protein-like 2           |
| 1419226_at             | CD96 antigen                                                  |
| 1416904_at             | Muscleblind-like 1 (Drosophila)                               |
| 1420558_at             | selectin, platelet                                            |
| 1455626_at             | homeo box A9                                                  |
| 1455435_s_at           | Choline dehydrogenase                                         |
| 1421628_at             | interleukin 18 receptor 1                                     |
| 1430387_at             | RIKEN cDNA 1810073O08 gene                                    |
| 1420805_at             | myosin light chain 2, precursor lymphocyte-specific           |
| 1417749_a_at           | RIKEN cDNA D130061D10 gene                                    |
| 1431475_a_at           | homeo box A10                                                 |
| 1451310_a_at           | cathepsin L                                                   |
| 1419605_at             | macrophage galactose N-acetyl-galactosamine specific lectin 1 |
| 1457102_at             | RIKEN cDNA A030001D16 gene                                    |
| 1448470_at             | Fructose bisphosphatase 3                                     |
| 1426953_at             | high mobility group box 2-like 1                              |
| 1443534_at             | Muscleblind-like 1 (Drosophila) [BLAST]                       |
| 1449937_at             | placental protein 11 related                                  |
| 1428792_at             | breast carcinoma amplified sequence 1                         |
| 1452855_at             | RIKEN cDNA 2410015A16 gene                                    |
| 1443260_at             | myeloid ecotropic viral integration site 1                    |
| 1429398_at             | RIKEN cDNA 5730446D14 gene [BLAST]                            |
| 1439066_at             | angiopoietin 1                                                |
| 1431008_at             | RIKEN cDNA 0610037M15 gene                                    |
| 1416768_at             | RIKEN cDNA 1110003E01 gene                                    |
| 1430580_at             | RIKEN cDNA 2810030E01 gene                                    |
| 1418536_at             | Histocompatibility 2, Q region locus 7                        |
| 1425525_a_at           | purinergic receptor P2X, ligand-gated ion channel 4           |
| 1437012_x_at           | Rap guanine nucleotide exchange factor (GEF) 3                |
| 1416635_at             | sphingomyelin phosphodiesterase, acid-like 3A                 |
| 1416408_at             | RIKEN cDNA D130055E20 gene                                    |
| 1451535_at             | interleukin 31 receptor A                                     |
| 1429274_at             | RIKEN cDNA 2310010M24 gene                                    |
| 1425891_a_at           | GH regulated TBC protein 1                                    |
| 1419602_at             | homeo box A2                                                  |
| 1422188_s_at           | T-cell receptor gamma, variable 4                             |

1449499\_at homeo box A7  
1429184\_at RIKEN cDNA 9130002C22 gene  
1447923\_at RIKEN cDNA 1810026B05 gene [BLAST]  
1420842\_at protein tyrosine phosphatase, receptor type, F  
1418993\_s\_at Coagulation factor X  
1460515\_at RIKEN cDNA 8430419K02 gene  
1425570\_at signaling lymphocytic activation molecule family member 1  
1418149\_at chromogranin A  
1455053\_a\_at Testis derived transcript 3 [BLAST]  
1428651\_at RIKEN cDNA 4930429H24 gene  
1426387\_x\_at RIKEN cDNA 9030221M09 gene  
1438968\_x\_at serine protease inhibitor, Kunitz type 2  
1441206\_at synaptopodin 2  
1455796\_x\_at olfactomedin 1  
1418884\_x\_at tubulin, alpha 1  
1439825\_at cDNA sequence BC023741  
1434140\_at mcf.2 transforming sequence-like  
1418778\_at RIKEN cDNA 9030408N13 gene  
1422103\_a\_at signal transducer and activator of transcription 5B  
1424108\_at glyoxalase 1  
1420678\_a\_at interleukin 17 receptor B  
1431255\_at calreticulin 3  
1451564\_at Poly (ADP-ribose) polymerase family, member 14  
1449009\_at Transcribed locus  
1446307\_at poly(A) polymerase gamma [BLAST]  
1460319\_at Fucosyltransferase 8  
1417235\_at EH-domain containing 3  
1435510\_at Protein phosphatase 1H (PP2C domain containing)  
1434670\_at kinesin family member 5A [BLAST]  
1415971\_at myristoylated alanine rich protein kinase C substrate  
1435458\_at proviral integration site 1  
1452982\_at RIKEN cDNA A330103N21 gene  
1459327\_at Mus musculus transcribed sequences  
1432950\_at Solute carrier family 24 (sodium/potassium/calcium exchanger), member 2  
1455220\_at frequently rearranged in advanced T-cell lymphomas 2  
1451112\_s\_at death-associated protein  
1451814\_a\_at HIV-1 tat interactive protein 2, homolog (human)  
1433563\_s\_at Der1-like domain family, member 1  
1424857\_a\_at Tripartite motif protein 34  
1439163\_at Transcribed locus  
1426642\_at fibronectin 1  
1453119\_at RIKEN cDNA 4933428L19 gene  
1437470\_at Pbx/knotted 1 homeobox  
1439085\_at RIKEN cDNA C130039O16 gene  
1451999\_at LIM domain binding 3  
1438568\_at MAS-related GPR, member E



1454858\_x\_at RIKEN cDNA 3300001H21 gene  
1426302\_at transmembrane protease, serine 4  
1423135\_at thymus cell antigen 1, theta  
1435066\_at Phosphatidylinositol transfer protein, cytoplasmic 1  
1424438\_a\_at leptin receptor overlapping transcript  
1421375\_a\_at S100 calcium binding protein A6 (calcylin)  
1428496\_at SECIS binding protein 2  
1424852\_at myocyte enhancer factor 2C [BLAST]  
1460365\_a\_at dynamin 1  
1447089\_at ADP-ribosylation factor-like 1  
1417101\_at heat shock protein 2  
1425396\_a\_at lymphocyte protein tyrosine kinase  
1425099\_a\_at aryl hydrocarbon receptor nuclear translocator-like  
1427271\_at RIKEN cDNA 6030404E16 gene  
1424008\_a\_at RNA binding protein with multiple splicing 2  
1434853\_x\_at makorin, ring finger protein, 1  
1451449\_at RIKEN cDNA 4933407N01 gene  
1448237\_x\_at lactate dehydrogenase 2, B chain  
1429352\_at molybdenum cofactor sulfurase  
1434329\_s\_at adiponectin receptor 2  
1440217\_at Similar to hypothetical protein FLJ39743  
1427433\_s\_at Homeo box A3  
1428840\_s\_at RIKEN cDNA 1500002B03 gene  
1439448\_x\_at RIKEN cDNA 2400003B06 gene  
1424936\_a\_at Similar to axonemal dynein heavy chain 8 Dnahc8  
1421345\_at lecithin-retinol acyltransferase (phosphatidylcholine-retinol-O-acyltransferase)  
1418490\_at serine dehydratase-like  
1446309\_at Mus musculus transcribed sequences  
1433593\_at yippee-like 5 (Drosophila)  
1445260\_at Testis derived transcript 3  
1427038\_at preproenkephalin 1  
1437119\_at Endoplasmic reticulum (ER) to nucleus signalling 1  
1433832\_at RIKEN cDNA B230369L08 gene  
1450421\_at transforming growth factor alpha  
1418825\_at interferon inducible protein 1  
1434999\_at suppressor of variegation 4-20 homolog 1 (Drosophila)  
1424031\_at sorting nexin 11  
1417834\_at synaptojanin 2 binding protein  
1435312\_at Transcribed locus [BLAST]  
1457321\_at RIKEN cDNA D130037M23 gene  
1422420\_at myoglobin  
1430168\_at CSA-conditional, T cell activation-dependent protein  
1434082\_at ELK3, member of ETS oncogene family  
1436180\_at DnaJ (Hsp40) homolog, subfamily C, member 5  
1425129\_a\_at transaldolase 1  
1426799\_at RAB8B, member RAS oncogene family

1448260\_at ubiquitin carboxy-terminal hydrolase L1  
1418553\_at rho/rac guanine nucleotide exchange factor (GEF) 18  
1456335\_at gene model 106, (NCBI)  
1425594\_at laminin gamma 3  
1442267\_at syntaxin binding protein 4 [BLAST]  
1457162\_at expressed sequence AA691260  
1418433\_at RIKEN cDNA C230066K19 gene  
1447927\_at expressed sequence AI595338  
1451114\_at CKLF-like MARVEL transmembrane domain containing 6  
1426355\_a\_at RIKEN cDNA 6330578E17 gene  
1453154\_at RIKEN cDNA 1700029M20 gene  
1424888\_at RIKEN cDNA 9530046H09 gene  
1437887\_at RIKEN cDNA E130306M17 gene  
1438752\_at Mus musculus adult male hypothalamus cDNA, RIKEN full-length enriched library,  
clone:A230058F20 product:hypothetical protein, full insert sequence  
1449932\_at casein kinase 1, delta  
1423144\_at RIKEN cDNA 6330412C24 gene  
1435445\_at Cyclin T2  
1456064\_at expressed sequence AI504432  
1440831\_at RIKEN cDNA 6230421P05 gene [BLAST]  
1460723\_at melanocortin 5 receptor  
1445532\_at RIKEN cDNA C230040D10 gene  
1451446\_at RIKEN cDNA 9530013L04 gene  
1454853\_s\_at expressed sequence AW146154  
1417999\_at Integral membrane protein 2B  
1456510\_x\_at RIKEN cDNA 3300001H21 gene  
1449108\_at ferredoxin 1  
1427532\_at T-cell receptor interacting molecule  
1416891\_at numb gene homolog (Drosophila)  
1452864\_at Hypothetical protein A130035F20  
1439427\_at claudin 9  
1446239\_at RNA binding site for Dazl protein, clone be2  
1456142\_x\_at LIM domain containing preferred translocation partner in lipoma  
1434283\_at AT rich interactive domain 5B (Mrf1 like) [BLAST]  
1434683\_at RIKEN cDNA 2600010L24 gene  
1417335\_at sulfotransferase family, cytosolic, 2B, member 1  
1420870\_at Myeloid/lymphoid or mixed lineage-leukemia translocation to 10 homolog (Drosophila)  
1436419\_a\_at RIKEN cDNA 1700097N02 gene  
1437624\_x\_at RIKEN cDNA 1110001K21 gene  
1442693\_at Tripartite motif protein 34  
1441779\_at RIKEN cDNA 9530006C21 gene  
1428871\_at RIKEN cDNA 4121402D02 gene  
1452844\_at POU domain, class 6, transcription factor 1  
1440626\_at homeo box D13 [BLAST]  
1421003\_at glucocorticoid modulatory element binding protein 1  
1418956\_at Serine/threonine protein kinase SSTK

|              |                                                    |
|--------------|----------------------------------------------------|
| 1447151_at   | RIKEN cDNA 4930519N13 gene                         |
| 1424646_at   | uridine-cytidine kinase 1-like 1                   |
| 1449814_at   | frequently rearranged in advanced T-cell lymphomas |
| 1424821_at   | Nedd4 family interacting protein 1                 |
| 1438452_at   | RIKEN cDNA A630080F05 gene                         |
| 1435240_at   | bromodomain adjacent to zinc finger domain, 2B     |
| 1426504_a_at | Ring finger protein 121                            |
| 1449875_s_at | histocompatibility 2, T region locus 10            |
| 1420915_at   | signal transducer and activator of transcription 1 |
| 1448418_s_at | RIKEN cDNA A730061H03 gene                         |
| 1433471_at   | Transcription factor 7, T-cell specific            |
| 1449815_a_at | Single-stranded DNA binding protein 2              |
| 1443635_at   | BCL2/adenovirus E1B 19kD interacting protein like  |
| 1455231_s_at | RIKEN cDNA 2310011J03 gene                         |
| 1424759_at   | Expressed sequence AV216361                        |

**Supplementary Table 2. Genes under-expressed in all *Mll-AF9* populations**

| <b><u>Probe ID</u></b> | <b><u>Gene Description</u></b>                                                |
|------------------------|-------------------------------------------------------------------------------|
| 1450344_a_at           | Prostaglandin E receptor 3 (subtype EP3)                                      |
| 1416168_at             | serine (or cysteine) proteinase inhibitor, clade F, member 1                  |
| 1422851_at             | High mobility group AT-hook 2                                                 |
| 1433908_a_at           | cortactin                                                                     |
| 1416529_at             | epithelial membrane protein 1                                                 |
| 1447640_s_at           | pre B-cell leukemia transcription factor 3                                    |
| 1445546_at             | Prostaglandin E receptor 3 (subtype EP3)                                      |
| 1443394_at             | High mobility group AT-hook 2 [BLAST]                                         |
| 1448918_at             | Solute carrier organic anion transporter family, member 3a1                   |
| 1419202_at             | cystatin F (leukocystatin)                                                    |
| 1437424_at             | RIKEN cDNA C430017H16 gene                                                    |
| 1428642_at             | solute carrier family 35, member D3                                           |
| 1449404_at             | Phosphatidylinositol-4-phosphate 5-kinase, type II, alpha                     |
| 1457424_at             | Eyes absent 1 homolog (Drosophila)                                            |
| 1424254_at             | interferon induced transmembrane protein 1                                    |
| 1425062_at             | RIKEN cDNA A230020G22 gene                                                    |
| 1436907_at             | neuron navigator 1                                                            |
| 1448942_at             | guanine nucleotide binding protein (G protein), gamma 11                      |
| 1426566_s_at           | interleukin 17 receptor E                                                     |
| 1436970_a_at           | platelet derived growth factor receptor, beta polypeptide                     |
| 1432057_a_at           | EST AI197291                                                                  |
| 1426389_at             | calcium/calmodulin-dependent protein kinase ID                                |
| 1425536_at             | syntaxin 3                                                                    |
| 1459665_s_at           | MRV integration site 1                                                        |
| 1421457_a_at           | SAM domain, SH3 domain and nuclear localisation signals, 1                    |
| 1440179_x_at           | Similar to hypothetical protein MGC26996; chromosome 6 open reading frame 172 |
| 1436759_x_at           | calponin 3, acidic                                                            |
| 1437217_at             | ankyrin repeat domain 6                                                       |
| 1433891_at             | G protein-coupled receptor 48                                                 |
| 1429589_at             | Transcribed locus                                                             |
| 1451791_at             | tissue factor pathway inhibitor                                               |
| 1438306_at             | RIKEN cDNA 3110001E11 gene                                                    |
| 1430978_at             | ribosomal protein S25                                                         |
| 1417404_at             | ELOVL family member 6, elongation of long chain fatty acids (yeast)           |
| 1455656_at             | B and T lymphocyte associated                                                 |
| 1437008_x_at           | RIKEN cDNA 1110006I15 gene                                                    |
| 1419722_at             | protease, serine, 19 (neuropsin)                                              |
| 1438936_s_at           | Ribonuclease, RNase A family 4                                                |
| 1423835_at             | zinc finger protein 503                                                       |
| 1417323_at             | RIKEN cDNA 5430413I02 gene                                                    |
| 1418351_a_at           | DNA methyltransferase 3B                                                      |
| 1428572_at             | brain abundant, membrane attached signal protein 1                            |
| 1426755_at             | cytoskeleton-associated protein 4                                             |

1438571\_at budding uninhibited by benzimidazoles 1 homolog (*S. cerevisiae*)  
1438160\_x\_at solute carrier organic anion transporter family, member 4a1  
1454795\_at Cobl-like 1  
1455452\_x\_at *Mus musculus* transcribed sequences  
1451780\_at B-cell linker  
1451332\_at zinc finger protein 521  
1426628\_at Transmembrane protein 34  
1460578\_at FYVE, RhoGEF and PH domain containing 5  
1421144\_at retinitis pigmentosa GTPase regulator interacting protein 1  
1447965\_at *Mus musculus* transcribed sequence with moderate similarity to protein prf:1614337A (*M.musculus*) 1614337A formin [*Mus musculus*]  
1448892\_at dedicator of cytokinesis 7  
1452119\_at RIKEN cDNA 2600005C20 gene  
1456383\_at RIKEN cDNA 2410005K20 gene  
1423760\_at CD44 antigen  
1418355\_at nucleobindin 2  
1457582\_at Ubiquitously transcribed tetratricopeptide repeat gene, Y chromosome  
1451985\_at Leucine-rich repeat kinase 1  
1457743\_at DNA segment, Chr 13, Brigham & Women's Genetics 1146 expressed  
1427283\_at myeloid/lymphoid or mixed-lineage leukemia  
1435149\_at phospholipase C, gamma 1  
1451089\_a\_at archain 1  
1416996\_at TBC1 domain family, member 8  
1439664\_at RIKEN cDNA 1700012F10 gene  
1449591\_at caspase 4, apoptosis-related cysteine protease  
1456584\_x\_at 3-phosphoglycerate dehydrogenase  
1447851\_x\_at ATPase, class V, type 10A  
1423596\_at Proteasome (prosome, macropain) subunit, beta type 7  
1436867\_at sarcalumenin  
1420928\_at beta galactoside alpha 2,6 sialyltransferase 1  
1416469\_at leucine zipper protein 1  
1456195\_x\_at integrin beta 5  
1448985\_at dual specificity phosphatase 22  
1450718\_at Adaptor protein with pleckstrin homology and src  
1456795\_at RIKEN cDNA D330027G24 gene  
1437621\_x\_at 3-phosphoglycerate dehydrogenase  
1437861\_s\_at Protein kinase C, epsilon  
1457510\_at *Mus musculus* transcribed sequence with weak similarity to protein pir:I49130 (*M.musculus*) I49130 reverse transcriptase - mouse  
1417849\_at Glucocorticoid induced gene 1  
1429846\_at RIKEN cDNA 9030411K21 gene [BLAST]  
1428373\_at RIKEN cDNA 1500005N04 gene  
1441242\_at dipeptidylpeptidase 4  
1441089\_at Transcribed locus  
1424065\_at ER degradation enhancer, mannosidase alpha-like 1  
1452073\_at RIKEN cDNA 6720460F02 gene

1422751\_at transducin-like enhancer of split 1, homolog of Drosophila E(spl)  
1419872\_at colony stimulating factor 1 receptor  
1435560\_at integrin alpha L  
1422948\_s\_at histone 1, H4a  
1444248\_at reticulocalbin 2  
1431256\_at RIKEN cDNA 5033423O07 gene  
1435993\_at Mus musculus adult male diencephalon cDNA, RIKEN full-length enriched library, clone:9330168G06 product:SCAN-KRAB-zinc finger gene 1, full insert sequence  
1417301\_at frizzled homolog 6 (Drosophila)  
1423059\_at PTK2 protein tyrosine kinase 2  
1445360\_at gb:BF318215 /DB\_XREF=gi:11266785 /DB\_XREF=ux08a07.x1 /CLONE=IMAGE:3470 /FEA=EST /CNT=3 /TID=Mm.157542.1 /TIER=ConsEnd /STK=2 /UG=Mm.157542 /UG\_TITLE=ESTs  
1433625\_at RIKEN cDNA 5830434P21 gene  
1441891\_x\_at ELOVL family member 7, elongation of long chain fatty acids (yeast)  
1434600\_at tight junction protein 2  
1420804\_s\_at C-type (calcium dependent, carbohydrate recognition domain) lectin, superfamily member  
1437279\_x\_at syndecan 1  
1453285\_at RIKEN cDNA 2600017H02 gene  
1436395\_at caspase recruitment domain family, member 6  
1442754\_at RIKEN cDNA C030013G03 gene  
1431931\_a\_at RAB, member of RAS oncogene family-like 2A  
1427284\_a\_at tocopherol (alpha) transfer protein  
1437811\_x\_at LOC434352  
1423194\_at Rho GTPase activating protein 5 [BLAST]  
1456844\_at Calcium/calmodulin-dependent protein kinase II, delta  
1456072\_at Protein phosphatase 1, regulatory (inhibitor) subunit 9A  
1429612\_at RIKEN cDNA F830004D09 gene  
1460314\_s\_at Histone1, H3d  
1452092\_at RIKEN cDNA 4631426J05 gene  
1418981\_at caspase 12  
1428795\_at Similar to chromosome 6 open reading frame 192; dJ55C23.6 gene  
1434406\_at SLIT-ROBO Rho GTPase activating protein 2  
1427682\_a\_at early growth response 2  
1425383\_a\_at Pre B-cell leukemia transcription factor 1  
1447935\_at RIKEN cDNA C730036B14 gene  
1434945\_at Hypothetical protein A330042H22  
1452013\_at ATPase, class V, type 10A  
1456789\_at Zinc finger protein 462  
1454919\_at N-myristoyltransferase 2  
1450955\_s\_at sortilin 1  
1444350\_at RIKEN cDNA 9830137M10 gene  
1435580\_at RIKEN cDNA C230081A13 gene [BLAST]  
1441656\_at RIKEN cDNA B930068K11 gene [BLAST]  
1455786\_at RIKEN cDNA 2610036F08 gene  
1454655\_at Diacylglycerol kinase, delta

1438561\_x\_at RIKEN cDNA 4930538D17 gene  
1448754\_at retinol binding protein 1, cellular  
1433051\_at RIKEN cDNA C030027H14 gene  
1416498\_at peptidylprolyl isomerase C  
1455970\_at Transcribed sequence with moderate similarity to protein sp:P00722 (E. coli)  
BGAL\_ECOLI Beta-galactosidase  
1433716\_x\_at Transcribed locus  
1456250\_x\_at transforming growth factor, beta induced  
1416301\_a\_at Early B-cell factor 1  
1429360\_at Kruppel-like factor 3 (basic)  
1439754\_at SRY-box containing gene 12  
1459916\_at RIKEN cDNA 5730488B01 gene  
1447852\_x\_at RIKEN cDNA 2900002H16 gene  
1426994\_at RIKEN cDNA 9430090L19 gene  
1440068\_at RIKEN cDNA 9930116O05 gene [BLAST]  
1429459\_at sema domain, immunoglobulin domain (Ig), short basic domain, secreted, (semaphorin) 3D  
1441001\_at Expressed sequence AI225934 [BLAST]  
1449504\_at karyopherin (importin) alpha 1  
1419538\_at FMS-like tyrosine kinase 3  
1436132\_at RIKEN cDNA 9830001H06 gene [BLAST]  
1429301\_at casein kinase II, alpha 2, polypeptide  
1455946\_x\_at thymosin, beta 10  
1421385\_a\_at myosin VIIa  
1436209\_at RIKEN cDNA 4732437J24 gene  
1457278\_at RIKEN cDNA 6720489N17 gene  
1420444\_at solute carrier family 22 (organic cation transporter), member 3  
1437343\_x\_at ATPase family, AAA domain containing 3A  
1457707\_at LOC434199  
1452654\_at zinc finger, DHHC domain containing 2  
1453360\_a\_at testis expressed gene 9  
1434990\_at Protein phosphatase 1E (PP2C domain containing) [BLAST]  
1434773\_a\_at solute carrier family 2 (facilitated glucose transporter), member 1  
1452878\_at Protein kinase C, epsilon  
1430481\_at RIKEN cDNA 4930545L23 gene  
1452459\_at Calmodulin binding protein 1  
1424042\_at transmembrane protein 5  
1428626\_at RIKEN cDNA 2210402C18 gene  
1440637\_at Intersectin 1 (SH3 domain protein 1A) [BLAST]  
1455321\_at DDHD domain containing 1  
1428263\_a\_at Transcription elongation factor B (SIII), polypeptide 2  
1454892\_at Phosphatidylinositol transfer protein, beta  
1416359\_at sorting nexin associated golgi protein 1  
1424336\_at RIKEN cDNA 8430432M10 gene  
1419152\_at RIKEN cDNA 2810417H13 gene  
1424095\_at RNA terminal phosphate cyclase domain 1  
1434936\_at expressed sequence C86302

|              |                                            |
|--------------|--------------------------------------------|
| 1428661_at   | RIKEN cDNA 2810439M11 gene                 |
| 1452463_x_at | Immunoglobulin kappa chain variable 8 (V8) |
| 1424863_a_at | RIKEN cDNA B230339E18 gene                 |
| 1448316_at   | chemokine-like factor super family 3       |

**Supplementary Table 3: Genes up-regulated in common in the present analysis of knockin *Mll-AF9* mice and in the analysis of leukemic GMPs generated by *MLL-AF9* retrovirus transduction (Krivtsov et al., Nature 2006)**

| <u>Probe ID</u> | <u>Gene Description</u>                            |
|-----------------|----------------------------------------------------|
| 1416768_at      | RIKEN cDNA 1110003E01 gene                         |
| 1436419_a_at    | RIKEN cDNA 1700097N02 gene                         |
| 1435240_at      | bromodomain adjacent to zinc finger domain, 2B     |
| 1451114_at      | CKLF-like MARVEL transmembrane domain containing 6 |
| 1424936_a_at    | dynein, axonemal, heavy chain 8                    |
| 1418993_s_at    | coagulation factor X                               |
| 1431475_a_at    | homeo box A10                                      |
| 1427433_s_at    | homeo box A3                                       |
| 1448926_at      | homeo box A5                                       |
| 1449499_at      | homeo box A7                                       |
| 1455626_at      | homeo box A9                                       |
| 1451814_a_at    | HIV-1 tat interactive protein 2, homolog (human)   |
| 1451535_at      | interleukin 31 receptor A                          |
| 1424852_at      | myocyte enhancer factor 2C                         |
| 1443260_at      | myeloid ecotropic viral integration site 1         |
| 1455796_x_at    | olfactomedin 1                                     |
| 1435312_at      | Progesterin and adipoQ receptor family member VII  |
| 1427038_at      | preproenkephalin 1                                 |
| 1416635_at      | sphingomyelin phosphodiesterase, acid-like 3A      |
| 1433593_at      | yippee-like 5 ( <i>Drosophila</i> )                |
